# Supplementary material for: Temperature Stable Ion Exchange Resins as Catalysts for the Manufacturing of Vitamin Precursors by Aldol Reaction
Source: MDPI journal article supplement (doi:10.3390/ijms241814367), 2023-09-21
Supplement: s1 [file s1]

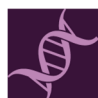

Supplementary materials

The following mathematical fits for the experiments of Amberlyst® A26 OH and Lewatit® K6465 were calculated according to the eq. S.1., as seen below.

$$X_t = X_{\max} \cdot (1 - e^{(-k \cdot t)}) \quad \text{eq. S.1.}$$

The results of the fit analysis for both catalysts in a first and second reaction cycle are depicted in Figure S1 and Table S1 and Table S2.

a)

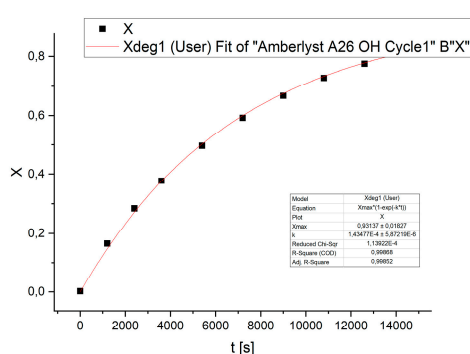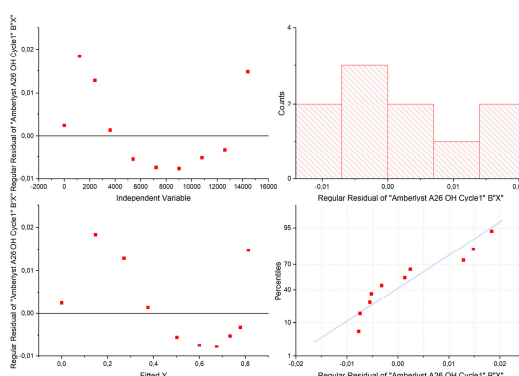

b)

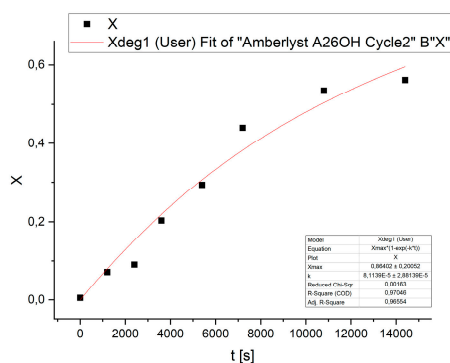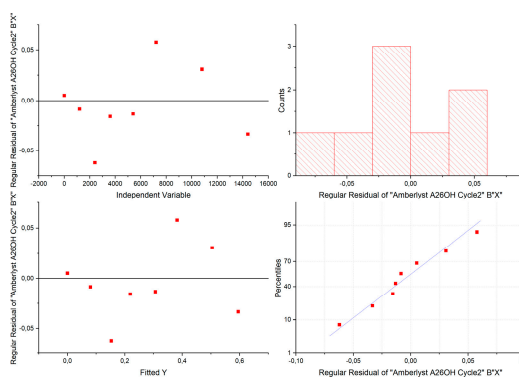

c)

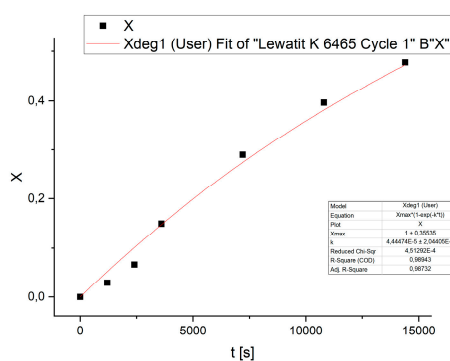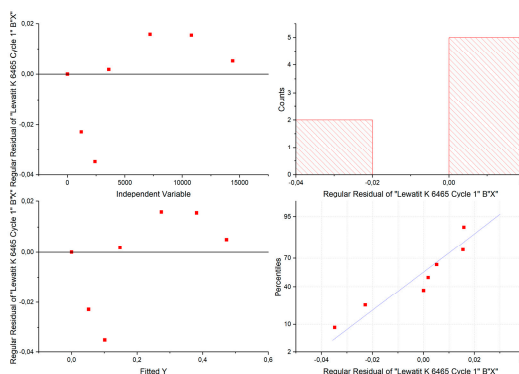

d)

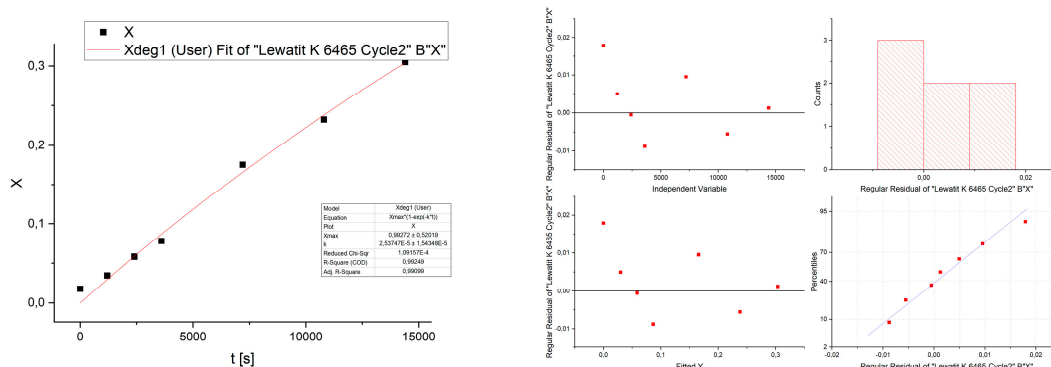

Figure S1. Fitted Reaction Progress Analysis for Amberlyst® A26 OH in a) first and b) second cycle and Lewatit® K6465 in c) first and d) second cycle.

Table S1. Comparative Analysis of Catalytic Performance for Amberlyst® A26 OH and Lewatit® K6465:  $X_{\max}$ , Rate Constants, R-squared, and Chi-squared Values.

| Catalyst                     | $X_{\max}$ | $k / s^{-1}$ | $R^2$   | $\chi^2$     |
|------------------------------|------------|--------------|---------|--------------|
| Amberlyst® A26 OH<br>Cycle 1 | 0.93137    | 1.43 E-04    | 0.99868 | 1.13922 E-04 |
| Amberlyst® A26 OH<br>Cycle 2 | 0.86402    | 8.11 E-05    | 0.97046 | 0.00163      |
| Lewatit® K6465<br>Cycle 1    | 1          | 4.44 E-05    | 0.98943 | 4.51292 E-04 |
| Lewatit® K6465<br>Cycle 2    | 0.99272    | 2.54 E-05    | 0.99249 | 1.09157 E-04 |

Table S2. Activation energies and reaction enthalpies as determined by DFT calculations on model structures.

| Model             | Reaction | $E_A$ [kcal/mol] | $\Delta G_R^0$ [kcal/mol] |
|-------------------|----------|------------------|---------------------------|
| Amberlyst® A26 OH | $S_N2$   | 14.9             | -36.0                     |
| Lewatit® K 6465   | $S_N2$   | 20.4             | -40.7                     |
|                   | Hofmann  | 22.7             | -34.8                     |

Table S3. Geometries of transition states.

a) Model Amberlyst® A26 OH  $S_N2$

|   |          |          |          |
|---|----------|----------|----------|
| C | -3.07041 | -0.04693 | 0.00121  |
| C | -4.56586 | -0.23015 | -0.00291 |
| C | -2.35474 | 0.02776  | 1.19816  |
| H | -5.03051 | 0.32026  | -0.82297 |
| H | -5.01016 | 0.1071   | 0.93452  |
| H | -4.82697 | -1.28524 | -0.13073 |
| C | -2.35494 | 0.04833  | -1.19565 |

---

|   |          |          |          |
|---|----------|----------|----------|
| C | -0.97312 | 0.17987  | 1.20086  |
| H | -2.88558 | -0.02044 | 2.14231  |
| C | -0.97439 | 0.19974  | -1.19626 |
| H | -2.88632 | 0.01675  | -2.14037 |
| C | -0.25781 | 0.25462  | 0.00304  |
| H | -0.45164 | 0.25876  | 2.14796  |
| H | -0.45279 | 0.29408  | -2.14187 |
| C | 1.228    | 0.47715  | 0.00299  |
| H | 1.61411  | 0.57917  | -1.00764 |
| H | 1.61785  | 0.56286  | 1.0137   |
| N | 1.77692  | -1.08723 | -0.00385 |
| C | 1.30256  | -1.82136 | -1.22298 |
| C | 1.3266   | -1.82308 | 1.22345  |
| C | 3.27893  | -1.03476 | -0.01875 |
| H | 1.6419   | -1.28904 | -2.10785 |
| H | 1.72301  | -2.82388 | -1.20736 |
| H | 0.21825  | -1.87317 | -1.20676 |
| H | 1.68492  | -1.29327 | 2.10239  |
| H | 1.7447   | -2.82642 | 1.19721  |
| H | 0.2421   | -1.87295 | 1.22919  |
| H | 3.60207  | -0.51053 | -0.91417 |
| H | 3.66444  | -2.05121 | -0.01932 |
| H | 3.61966  | -0.50442 | 0.86648  |
| O | 1.2075   | 2.08711  | 0.00698  |
| H | 1.08953  | 3.04527  | 0.00826  |

## b) Model Lewatit® K 6465 Hofmann-elimination

|   |          |          |          |
|---|----------|----------|----------|
| N | 2.73302  | -0.79042 | 0.42676  |
| C | 1.63834  | 0.0225   | -0.09503 |
| C | 0.29671  | -0.67493 | 0.10899  |
| C | -0.88615 | 0.14268  | -0.41507 |
| C | -2.23707 | -0.56223 | -0.26161 |
| C | -3.41378 | 0.26029  | -0.80075 |
| C | -4.6466  | -0.52986 | -1.01578 |
| N | -5.85944 | -0.28142 | 0.02188  |
| C | -6.93302 | -1.2757  | -0.26389 |
| C | -5.36801 | -0.45476 | 1.41886  |
| C | -6.39788 | 1.0986   | -0.15913 |
| H | 2.5714   | -1.78373 | 0.3287   |
| H | 1.63015  | 0.98419  | 0.42714  |
| H | 1.78243  | 0.24239  | -1.16348 |
| H | 0.16002  | -0.88169 | 1.17611  |

---

|   |          |          |          |
|---|----------|----------|----------|
| H | 0.31933  | -1.64724 | -0.39825 |
| H | -0.72417 | 0.37309  | -1.47541 |
| H | -0.91734 | 1.10685  | 0.10475  |
| H | -2.3793  | -0.79513 | 0.8036   |
| H | -2.15824 | -1.54655 | -0.76075 |
| H | -3.13501 | 0.72585  | -1.75258 |
| H | -3.47885 | 1.58354  | 0.15663  |
| H | -5.1424  | -0.32652 | -1.96632 |
| H | -4.52029 | -1.61567 | -0.91552 |
| H | -7.77221 | -1.10656 | 0.40828  |
| H | -7.25783 | -1.15823 | -1.29569 |
| H | -6.53772 | -2.27811 | -0.11489 |
| H | -6.19033 | -0.2793  | 2.11093  |
| H | -4.56799 | 0.26     | 1.58846  |
| H | -4.9972  | -1.47107 | 1.53524  |
| H | -6.78235 | 1.19123  | -1.17296 |
| H | -7.20243 | 1.2619   | 0.55627  |
| H | -5.59319 | 1.8093   | 0.00486  |
| O | -3.48705 | 2.46463  | 0.81522  |
| H | -2.63961 | 2.90074  | 0.66627  |
| C | 4.13646  | -0.4101  | 0.21091  |
| H | 4.35835  | -0.4441  | -0.83528 |
| H | 4.29756  | 0.58211  | 0.57761  |
| C | 5.05552  | -1.39076 | 0.96273  |
| C | 5.55895  | -2.51566 | 0.30879  |
| C | 5.38475  | -1.15435 | 2.29737  |
| C | 6.39087  | -3.40426 | 0.98962  |
| H | 5.29858  | -2.70216 | -0.74319 |
| C | 6.21771  | -2.0426  | 2.97826  |
| H | 4.98821  | -0.26771 | 2.81287  |
| C | 6.72067  | -3.1675  | 2.32468  |
| H | 6.7872   | -4.29127 | 0.47443  |
| H | 6.47745  | -1.85573 | 4.03044  |
| C | 7.63934  | -4.14882 | 3.07612  |
| H | 7.50238  | -5.13564 | 2.68581  |
| H | 8.65936  | -3.85256 | 2.94694  |
| H | 7.39457  | -4.1401  | 4.11771  |

c) Model Lewatit® K 6465 S<sub>N</sub>2

|   |         |         |          |
|---|---------|---------|----------|
| C | 1.18381 | 1.0171  | -0.00139 |
| H | 1.63123 | 1.33431 | -0.92445 |
| H | 1.63469 | 1.34086 | 0.91752  |

---

|   |          |          |          |
|---|----------|----------|----------|
| C | -5.23354 | 0.81939  | 0.35856  |
| H | -5.08386 | 0.73428  | 1.41974  |
| H | -6.1476  | 1.26517  | 0.01204  |
| N | -6.08388 | -0.96877 | 0.30624  |
| C | -5.1269  | -2.03954 | 0.63857  |
| C | -6.68783 | -1.19175 | -1.01978 |
| C | -7.1347  | -0.88143 | 1.33771  |
| H | -4.66859 | -1.82935 | 1.60404  |
| H | -5.63647 | -3.00676 | 0.69023  |
| H | -4.3529  | -2.09194 | -0.12466 |
| H | -7.36543 | -0.37111 | -1.25314 |
| H | -7.24876 | -2.13087 | -1.03336 |
| H | -5.9093  | -1.23964 | -1.77893 |
| H | -6.67701 | -0.69978 | 2.30929  |
| H | -7.70829 | -1.81128 | 1.38327  |
| H | -7.80927 | -0.05932 | 1.10139  |
| O | -4.79708 | 2.89768  | 0.78608  |
| H | -5.49354 | 3.10102  | 1.42339  |
| C | -4.05814 | 0.72083  | -0.57667 |
| C | -2.70133 | 0.57848  | 0.11892  |
| H | -4.19663 | -0.1122  | -1.2728  |
| H | -4.0602  | 1.62303  | -1.19033 |
| C | -1.53664 | 0.48555  | -0.86951 |
| H | -2.56025 | 1.43816  | 0.77738  |
| H | -2.70086 | -0.31136 | 0.75775  |
| C | -0.17219 | 0.38848  | -0.18287 |
| H | -1.67991 | -0.3846  | -1.52136 |
| H | -1.5487  | 1.36432  | -1.52528 |
| C | 0.98717  | 0.2771   | -1.16837 |
| H | -0.01628 | 1.26711  | 0.45179  |
| H | -0.16214 | -0.48318 | 0.48301  |
| N | 2.27947  | 0.2216   | -0.47856 |
| H | 0.99759  | 1.15334  | -1.82569 |
| H | 0.83299  | -0.60045 | -1.81898 |
| H | 2.27123  | -0.5599  | 0.17253  |
| C | 3.40948  | 0.04426  | -1.40183 |
| H | 3.28089  | -0.84303 | -2.0415  |
| H | 3.42755  | 0.91283  | -2.06735 |
| C | 4.72117  | -0.0599  | -0.66199 |
| C | 5.34825  | 1.07902  | -0.14708 |
| C | 5.3319   | -1.29428 | -0.45009 |
| C | 6.54288  | 0.98247  | 0.55409  |

---

|   |         |          |          |
|---|---------|----------|----------|
| H | 4.89418 | 2.05228  | -0.29995 |
| C | 6.53049 | -1.39143 | 0.2559   |
| H | 4.86913 | -2.19408 | -0.84215 |
| C | 7.15766 | -0.25677 | 0.76926  |
| H | 7.00942 | 1.88323  | 0.93947  |
| H | 6.98278 | -2.36589 | 0.40618  |
| C | 8.4632  | -0.35063 | 1.51875  |
| H | 8.72842 | -1.38835 | 1.72522  |
| H | 9.28059 | 0.09469  | 0.94393  |
| H | 8.41311 | 0.18328  | 2.47095  |
